# Supplementary material for: A Prospective Knowledge Assessment of Adolescent Liver Transplant Recipients after Tailored Education Intervention
Source: Hindawi journal article supplement (doi:10.1155/2023/9940562), 2023-01-01
Supplement: f1 [file 9940562.f1.docx]

Supplemental Data:

Scoring Eval & Follow-Up Responses

1 & 2 on Eval—not to be scored or asked of patient on follow-up

3—Total of 1 point.

4—Total of 2 points. 1 for less specific responses such as “life-saving.” 2 for any variation of “took my liver out and put a new one in,” “replace a sick liver with one that is working,” “getting a new liver from a donor,” etc.

5—Total of 2 points. 1 for variations of “because my liver was sick.” 2 for a specific diagnosis.

6—2 points for each lab, thus total of 12 points for the question. 1 for less specific responses such as “liver lab” or “kidney lab.” 2 for responses that include more detail such as “liver enzymes tell you when the liver is inflamed,” “bilirubin is high when bile ducts are damaged,” “INR tells you how well the blood is clotting and if the liver is working,” etc. For tacrolimus, 2 points if they know goal level.

7—1 point for naming at least one correctly or saying none if applicable.

8—1 point for each column. Divide total score for each column by number of meds on patient’s medication list in Epic. Thus the final score for each column is an average of responses for all patient’s medications if they are on more than 1 medicine.

Responses that were turned in blank or were incorrect are scored 0.
